# Supplementary material for: Telomerase-mediated immortalization of human vaginal wall fibroblasts derived from patients with pelvic organ prolapse
Source: PubMed Central journal article supplement — Chin Med J (Engl). 2023 Mar 13;136(5):578–87. doi: 10.1097/CM9.0000000000002278 (PMC10106167; doi:10.1097/cm9.0000000000002278), 2023-03-13
Supplement: cm9-136-578-s001.pdf [file cm9-136-578-s001.pdf]

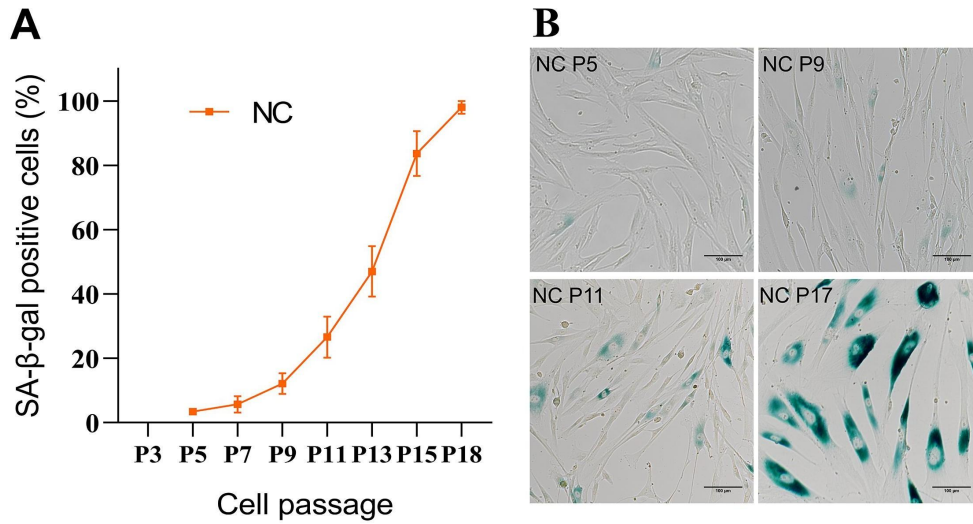

**Supplementary figure 1.** SA-β-gal staining assays for NC lentiviral vectors transfection group. Scale bar = 100μm.

**Supplementary Table 1:** Primers used in this study for RT-qPCR.

| Gene   | Primers sequences (Forward) | Primers sequences (Reverse) |
|--------|-----------------------------|-----------------------------|
| hTERT  | GCGTTTGGTGGATGATTTCT        | CAGGGCCTCGTCTTCTACAG        |
| COL1A1 | GTGCGATGACGTGATCTGTGA       | CGGTGGTTTCTTGGTCGGT         |
| COL3A1 | GGAGCTGGCTACTTCTCGC         | GGAACATCCTCCTTCAACAG        |
| ELN    | TGCTAGAGCGAATCCAGCTT        | CGCTGGTGCTCTTATCTTCC        |
| MMP2   | CCCACTGCGGTTTTCTCGAAT       | CAAAGGGGTATCCATCGCCAT       |
| MMP3   | ACAAAGGATACAACAGGGACCA      | GGAACCGAGTCAGGTCTGTG        |
| MMP9   | TGTACCGCTATGGTTACTCTCG      | GGCAGGGACAGTTGCTTCT         |
| TIMP1  | CTTCTGCAATTCCGACCTCGT       | ACGCTGGTATAAGGTGGTCTG       |
| TIMP2  | AAGCGGTCAGTGAGAAGGAAG       | GGGGCCGTGTAGATAAACTCTAT     |
| GAPDH  | AACGTGTCAGTGGTGGACCTG       | GAGACCACCTGGTGCTCAGTG       |

**Supplementary Table 2:** Part of short tandem repeat (STR) CLASTR\* results of i-hVWF.

| Accession                 | Name               | N° Markers | Score  |
|---------------------------|--------------------|------------|--------|
| <a href="#">CVCL_LG51</a> | CG0161             | 8          | 70.97% |
| <a href="#">CVCL_4641</a> | JHOC-7             | 8          | 70.97% |
| <a href="#">CVCL_3163</a> | SF-TY              | 8          | 70.97% |
| <a href="#">CVCL_8491</a> | KMP-3              | 8          | 68.97% |
| <a href="#">CVCL_F011</a> | Dch3               | 8          | 68.75% |
| <a href="#">CVCL_1737</a> | TC-YIK             | 8          | 68.75% |
| <a href="#">CVCL_5011</a> | SNU-1118           | 9          | 66.67% |
| <a href="#">CVCL_K269</a> | CC7T/VGH           | 8          | 66.67% |
| <a href="#">CVCL_3034</a> | MY                 | 8          | 66.67% |
| <a href="#">CVCL_3035</a> | MY-M12             | 8          | 66.67% |
| <a href="#">CVCL_3036</a> | MY-M13             | 8          | 66.67% |
| <a href="#">CVCL_1676</a> | SBC-1              | 8          | 66.67% |
| <a href="#">CVCL_W531</a> | SBC-2 [Human SCLC] | 8          | 66.67% |
| <a href="#">CVCL_8823</a> | SJNB-6             | 8          | 66.67% |

|                  |            |   |        |
|------------------|------------|---|--------|
| <u>CVCL_6531</u> | 305M       | 8 | 64.52% |
| <u>CVCL_Y008</u> | CE146T/VGH | 8 | 64.52% |
| <u>CVCL_LG80</u> | CG1359     | 8 | 64.52% |
| <u>CVCL_0T85</u> | HE30       | 8 | 64.52% |
| <u>CVCL_2969</u> | KAI3       | 8 | 64.52% |
| <u>CVCL_1326</u> | Karpas-45  | 8 | 64.52% |

\*The cell STR similarity search tool CLASTR (<https://web.expasy.org/cellosaurus-str-search/>) was used to check the STR testing data.
